# Supplementary material for: Combined Pharmacophore and Grid-Independent Molecular Descriptors (GRIND) Analysis to Probe 3D Features of Inositol 1,4,5-Trisphosphate Receptor (IP3R) Inhibitors in Cancer
Source: MDPI journal article supplement (doi:10.3390/ijms222312993), 2021-11-30
Supplement: s1 [file s1]

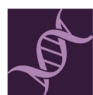

Supporting Information

# Combined Pharmacophore and Grid Independent Molecular Descriptors (GRIND) Analysis to Probe 3D features of Inositol 1, 4, 5-trisphosphate Receptor (IP<sub>3</sub>R) Inhibitors in Cancer

Humaira Ismatullah and Ishrat Jabeen \*

Research Centre for Modelling and Simulation (RCMS), NUST Interdisciplinary Cluster for Higher Education (NICHE), National University of Sciences and Technology (NUST), H-12 Islamabad (44000), Pakistan  
Email: Humaira (hismatullah.phd15@rcms.nust.edu.pk), Ishrat Jabeen (ishrat.jabeen@rcms.nust.edu.pk)

\* Correspondence: Dr. Ishrat Jabeen, Associate Professor (HOD), Department of Computational Sciences RCMS, National University of Sciences and Technology (NUST)  
Email: (ishrat.jabeen@rcms.nust.edu.pk); Tel.: +92-51-9085-5732

## Supporting Information

### Contents

#### 1. Results

|            |                                                                                                                                                                              |
|------------|------------------------------------------------------------------------------------------------------------------------------------------------------------------------------|
| Table S1   | The activity landscape and LipE profile of the IP <sub>3</sub> R ligand dataset.                                                                                             |
| Figure S1  | The physicochemical properties of the IP <sub>3</sub> R ligand dataset.                                                                                                      |
| Figure S2  | A plot of pIC <sub>50</sub> versus clogP showing Lipophilic Efficiency (LipE) Profile of IP <sub>3</sub> R inhibitors.                                                       |
| Figure S3  | Representation of chemical features by the pharmacophore model for the activity of ryanodine.                                                                                |
| Figure S4  | ROC curve between true positive rates (sensitivity) vs. false positive rate (1-specificity).                                                                                 |
| Figure S5  | The compounds (2D structures) used as external test set to validate the pharmacophore model.                                                                                 |
| Figure S6  | Chemical structures of Potential hits (IP <sub>3</sub> R modulators)                                                                                                         |
| Figure S7  | A step by step protocol of the ligand based virtual screening                                                                                                                |
| Figure S8  | Docking solutions of proposed hits in IP <sub>3</sub> R binding pocket.                                                                                                      |
| Figure S9  | A PCA plot between the first two principal components (PC) defining the descriptor space of the training set and test set.                                                   |
| Figure S10 | Correlations plot between experimental versus predicted inhibitory potencies (pIC <sub>50</sub> ) of IP <sub>3</sub> R antagonists by GRIND.                                 |
| Table S2   | The statistical parameters of cross-validation (Leave-Five-Out) of PLS models generated by GRIND.                                                                            |
| Table S3   | Experimental and predicted biological activity values (pIC <sub>50</sub> ) of training and test sets obtained after Leave-One-Out (LOO) cross-validation.                    |
| Table S4   | The experimental inhibitory potency of test set and the modified r <sup>2</sup> (rm <sup>2</sup> ) calculated.                                                               |
| Figure S11 | TIP contour around the template molecule showing the curved molecular boundary.                                                                                              |
| Figure S12 | The binding pose of the template molecule representing important pharmacophoric features in complementing with amino acid residues within the IP <sub>3</sub> R binding core |

#### 2. Materials and Methods

|            |                                                                                                                                                           |
|------------|-----------------------------------------------------------------------------------------------------------------------------------------------------------|
| Figure S13 | Step by step data curation process to obtain master database.                                                                                             |
| Figure S14 | A correlation plot between binding energies of top docked poses vs. potential inhibitory potency (pIC <sub>50</sub> )<br>Conformation generation protocol |

## 1. Results

**Table S1.** The activity landscape and LipE profile of the IP3R ligand dataset.

| Comp       | IC <sub>50</sub> (μM) | logP(o/w)  | cLogp       | pIC50      | LipE       | Ref        |
|------------|-----------------------|------------|-------------|------------|------------|------------|
| A2         | 0.02                  | -7.5       | -7.2        | 1.8        | 15.1       | [1]        |
| A8         | 0.04                  | -6.2       | -5.8        | 0.4        | 13.1       | [1]        |
| A10        | 0.01                  | -6.6       | -5.7        | 1.9        | 13.9       | [2]        |
| A6         | 0.43                  | -7.7       | -8.5        | 0.2        | 14.9       | [2]        |
| M2         | 0.02                  | -4.8       | -7.2        | 7.5        | 17.5       | [3]        |
| A1         | 0.03                  | -7.5       | -7.2        | 1.6        | 14.8       | [2]        |
| A9         | 0.62                  | -7.7       | -7.2        | 1.3        | 13.4       | [2]        |
| A7         | 3.01                  | -6.4       | -5.8        | 2.2        | 14.1       | [1]        |
| <b>M19</b> | <b>0.05</b>           | <b>1.5</b> | <b>2.71</b> | <b>6.7</b> | <b>4.5</b> | <b>[4]</b> |
| A5         | 0.17                  | -7.5       | -6.7        | 0.7        | 13.4       | [1]        |
| C2         | 0.19                  | -2.8       | -6.1        | 6.7        | 17.2       | [5]        |
| C3         | 0.38                  | -3.9       | -8.2        | 6.4        | 14.7       | [5]        |
| C1         | 0.42                  | -1.2       | -4.2        | 6.3        | 14.9       | [5]        |
| A3         | 0.05                  | 0.05       | 0.05        | 0.05       | 0.05       | [2]        |
| A4         | -6.4                  | -6.4       | -6.4        | -6.4       | -6.4       | [1]        |
| B3         | 5.86                  | 6.5        | 6.8         | 5.2        | -1.5       | [6]        |
| B1         | 6.60                  | 5.7        | 4.7         | 5.2        | 0.5        | [7]        |
| B5         | 2.53                  | 7.3        | 8.1         | 5.6        | -2.4       | [6]        |
| M4         | 5.00                  | -0.6       | 1.9         | 5.3        | 3.3        | [8]        |
| M3         | 5.00                  | 1.5        | 7.2         | 5.3        | -1.9       | [9]        |
| B6         | 0.65                  | 7.3        | 8.0         | 6.2        | -1.8       | [6]        |
| B2         | 5.01                  | 6.8        | 7.2         | 5.3        | -1.9       | [10]       |
| B4         | 6.40                  | 6.3        | 6.8         | 5.2        | -1.5       | [7]        |
| M5         | 15.0                  | 2.3        | 1.6         | 4.8        | 3.2        | [11]       |
| A12        | 20.0                  | -5.5       | -4.3        | -0.5       | 9.1        | [12]       |
| M13        | 22.0                  | 6.1        | 5.6         | 4.6        | -0.9       | [13]       |
| M1         | 34.0                  | -2.9       | -5.4        | 4.4        | 9.9        | [14]       |
| M7         | 50.0                  | 2.2        | 1.9         | 4.3        | 2.4        | [8]        |
| M6         | 50.0                  | 1.9        | 4.2         | 4.3        | 0.1        | [15]       |
| A11        | 93.0                  | -6.9       | -5.8        | -1.3       | 9.8        | [12]       |
| M9         | 120                   | 0.9        | 3.5         | 3.9        | 0.3        | [16]       |
| M14        | 140                   | 3.1        | 3.5         | 3.8        | 0.3        | [13]       |
| M15        | 145                   | 4.6        | 4.3         | 3.8        | -0.5       | [13]       |
| M16        | 160                   | 3.1        | 4.0         | 3.7        | -0.2       | [13]       |
| M8         | 340                   | 1.1        | 2.3         | 3.4        | 1.1        | [16]       |
| M17        | 450                   | 5.3        | 4.2         | 3.3        | 0.9        | [13]       |
| M18        | 2000                  | 1.7        | 2.8         | 2.6        | -0.1       | [4]        |
| M10        | 3300                  | -2.5       | -2.9        | 2.4        | 5.4        | [16]       |
| M11        | 8700                  | -1.9       | -1.9        | 2.0        | 3.9        | [16]       |
| M12        | 20000                 | -2.3       | -2.0        | 1.6        | 3.7        | [16]       |

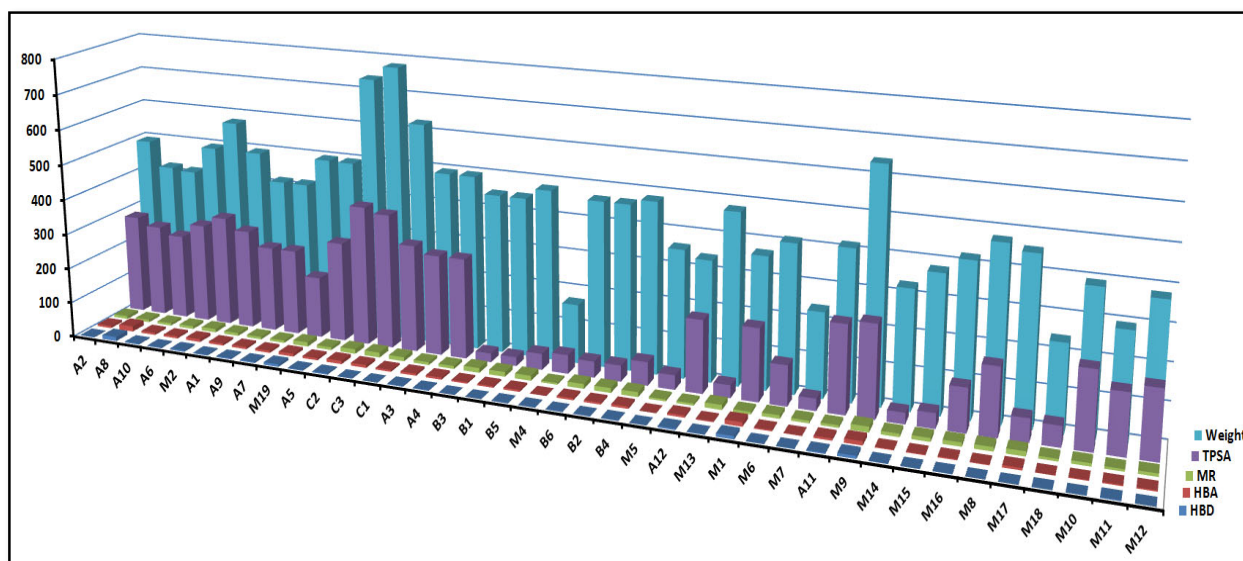

**Figure S1.** The physicochemical (molecular weight, TPSA, molar refractivity, and hydrogen bond acceptor/donor) properties of the IP<sub>3</sub>R ligand dataset.

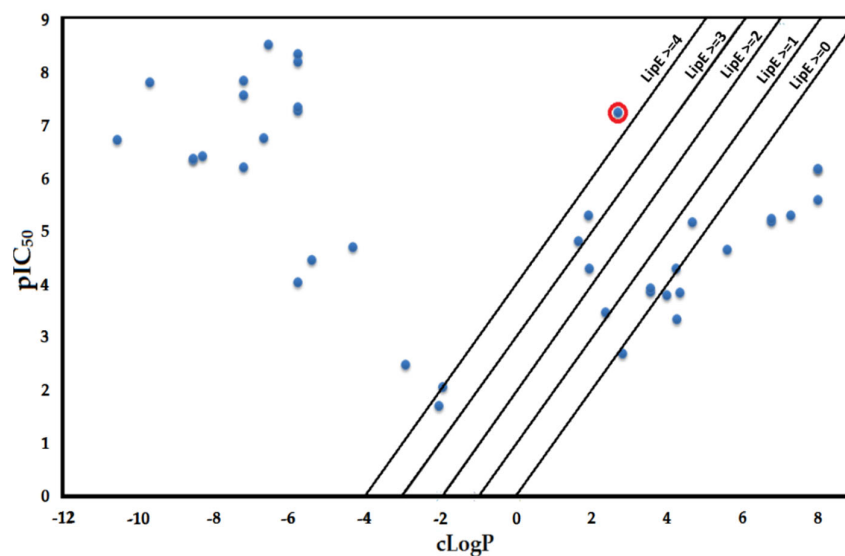

**Figure S2.** A plot of pIC<sub>50</sub> (inhibitory Potency) versus clogP showing Lipophilic Efficiency (LipE) profile of IP<sub>3</sub>R inhibitors. M<sub>19</sub> (Ryanodine) is circled red and selected as a template molecule because of the lipophilic efficiency profile (the most potent compound in the dataset (IC<sub>50</sub>: 0.055  $\mu$ M) with a clogP value of 2.71 and LipE value of 4.6).

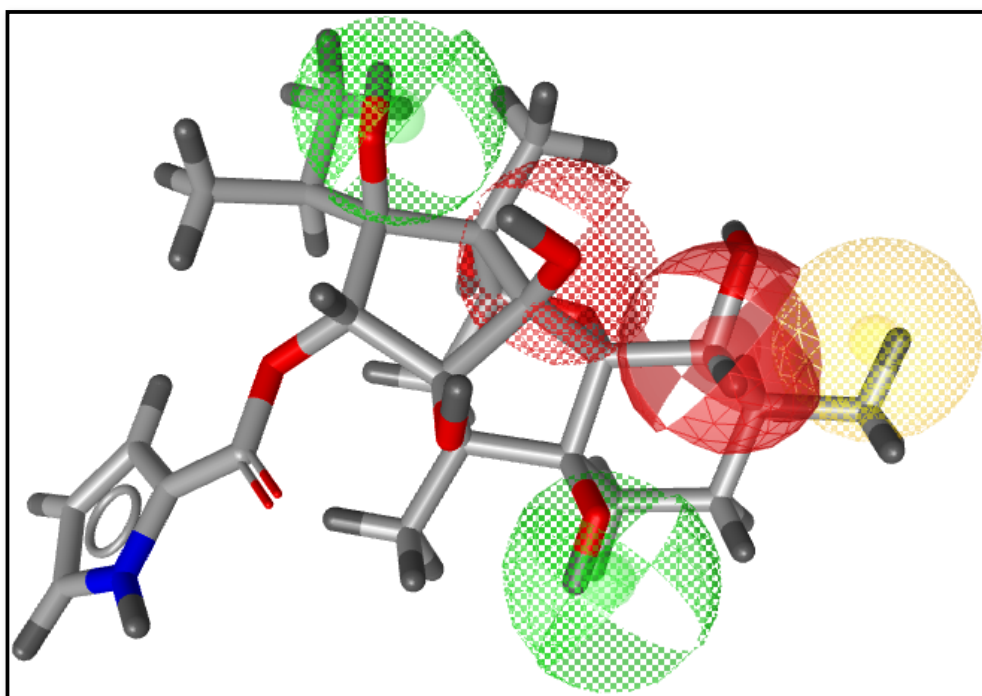

**Figure S3:** Shows the chemical features of the pharmacophore model responsible for the activity of ryanodine. The yellow circle represents the hydrophobic region. The hydrogen bond acceptor and hydrogen bond donors are represented by red and green circles respectively.

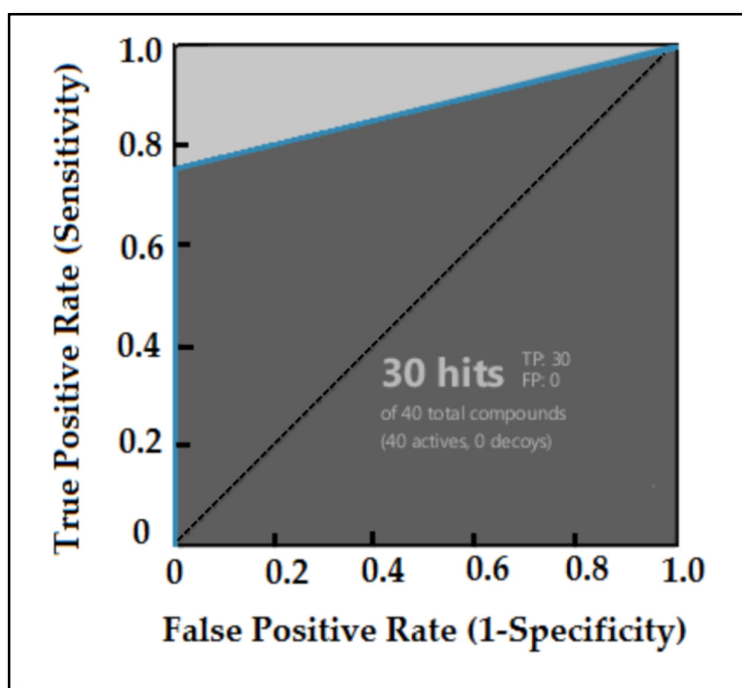

**Figure S4.** ROC curve between true positive (TP) rates (sensitivity) vs. false positive rate (1-specificity) of final selected pharmacophore model. Overall, out of 33 active compounds 30 were predicted as actives (TP) and 3 were predicted as inactive (FN).

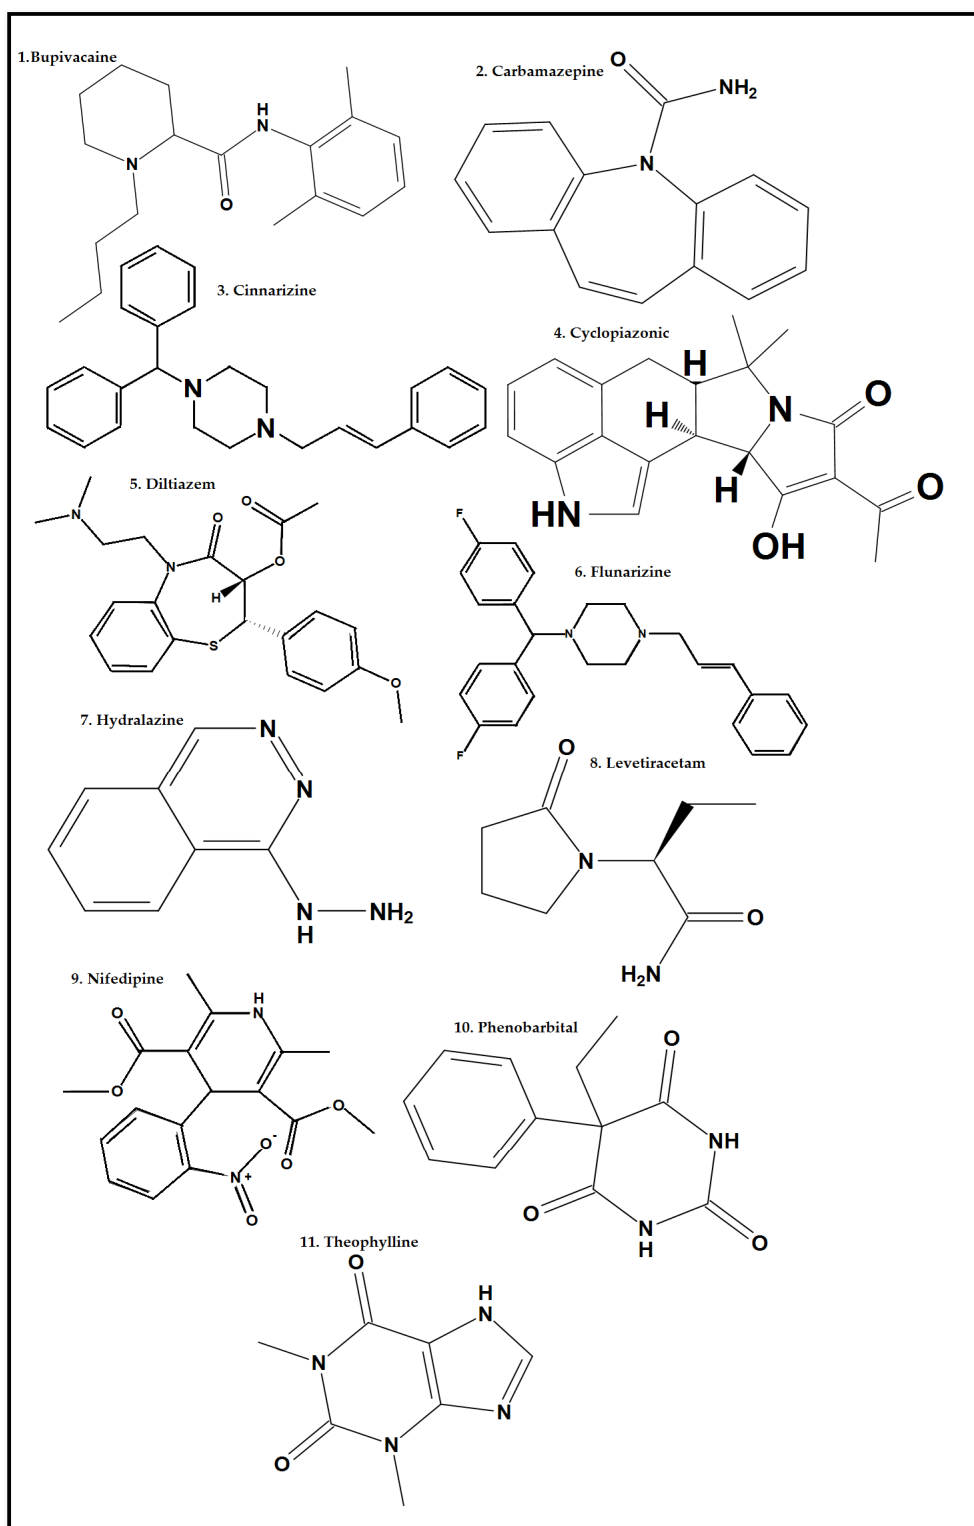

**Figure S5.** The chemical structures of the compounds of the external test set used to validate the pharmacophore model. This test set is named as 'Blind set', as the  $IC_{50}$  values were not defined in the literature [17-19].

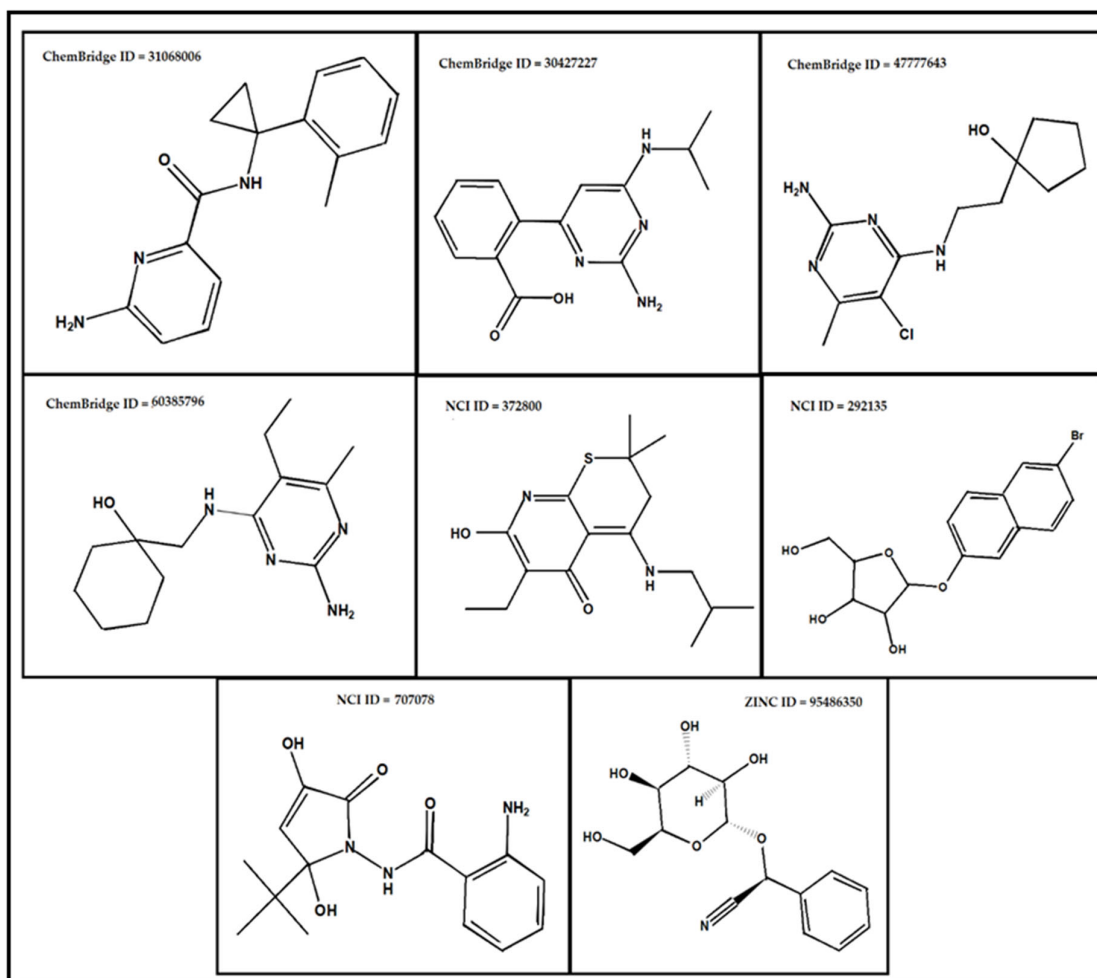

**Figure S6.** The chemical (2D) structures of the potential hit compounds shortlisted after pharmacophore based virtual screening of National Cancer Institute (NCI) database, ZINC database, and ChemBridge database.

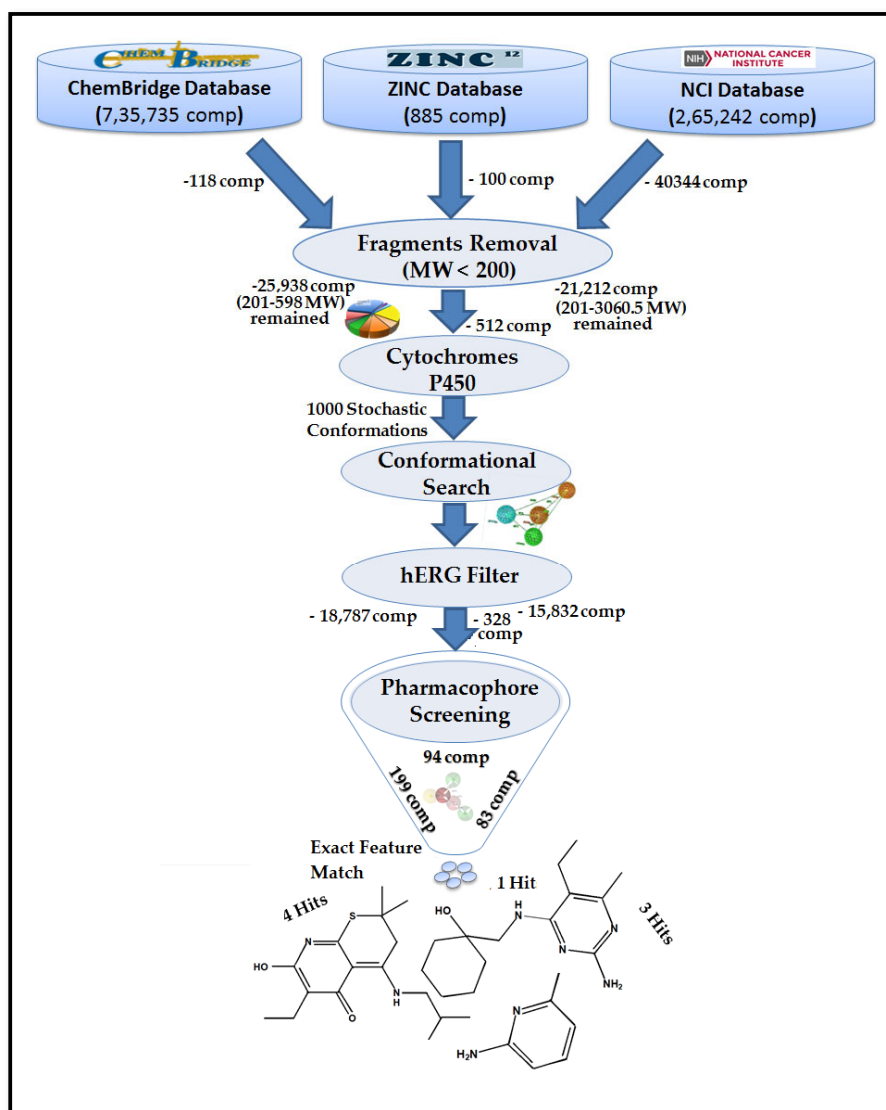

**Figure S7.** A step by step protocol of the ligand based virtual screening. The 735735 compounds from ChemBridge database, 885 (natural) compounds from Zinc database, and 265242 compounds from the National Cancer Institute (NCI) database were screened. After several filters application and Pharmacophore model screening the 4 hits from ChemBridge, 4 hits from NCI and 2 hits from Zinc database were shortlisted as IP<sub>3</sub>R modulators (antagonists).



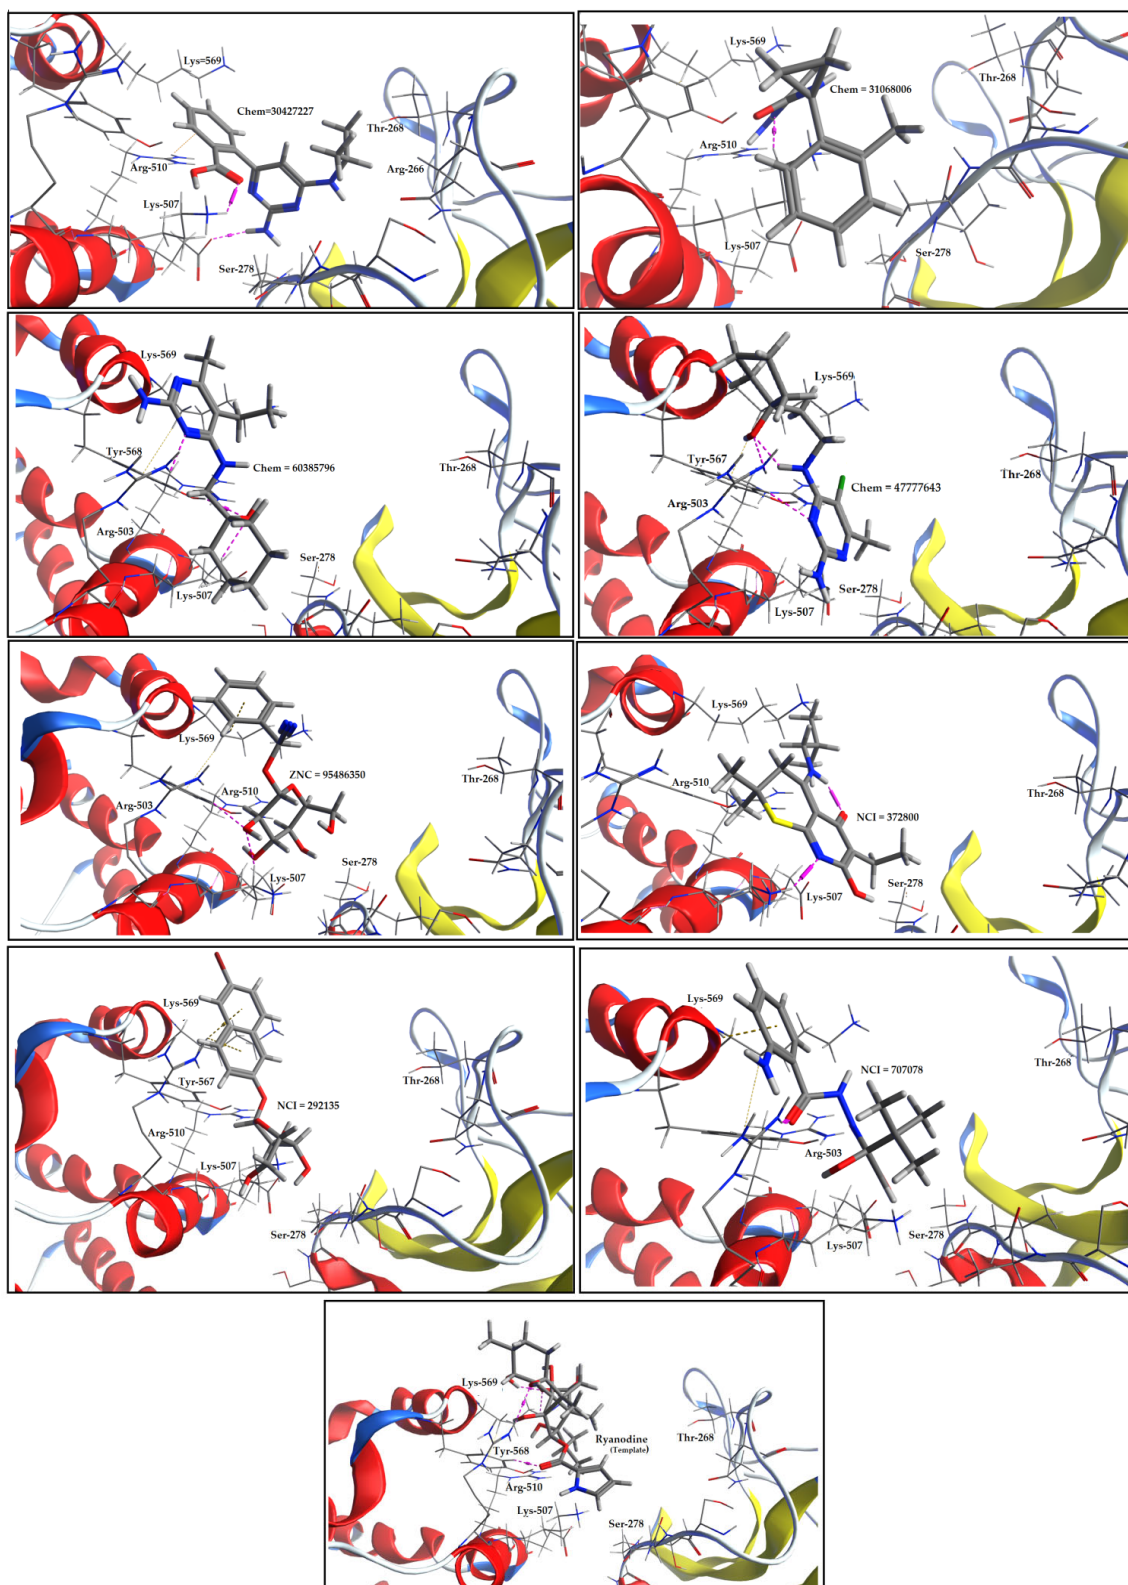

**Figure S8.** The best docked poses of shortlisted hits within the binding pocket of protein. The IP<sub>3</sub>R<sub>3</sub> protein is shown in backbone secondary structure and the interacting residues are shown in stick representation. Mostly, the ligand molecules interacted with Lys-569 and Lys-507 forming a  $\pi$ - $\pi$  interaction or surface contacts. Ligands interacted with Arg-503 and Arg-510 via hydrogen bond acceptor and donor interactions.



### 1. Principal Component Analysis:

The principal component analysis (PCA) [20] was performed to determine the structural variance in the training dataset by computing the complete GRIND descriptors set. In the training data set, 40 % structural variance has been described by the first two principal components (PC1 & PC2) (figure S9). The compounds in the form of a cluster at the right bottom side showed the molecules with a small structure containing only one hydrophobic ring, mainly class 'A' compounds and some from the class 'M'. Overall, the other compounds are more diverse with elongated chemical scaffolds and larger molecular weight, describing the data diversity.

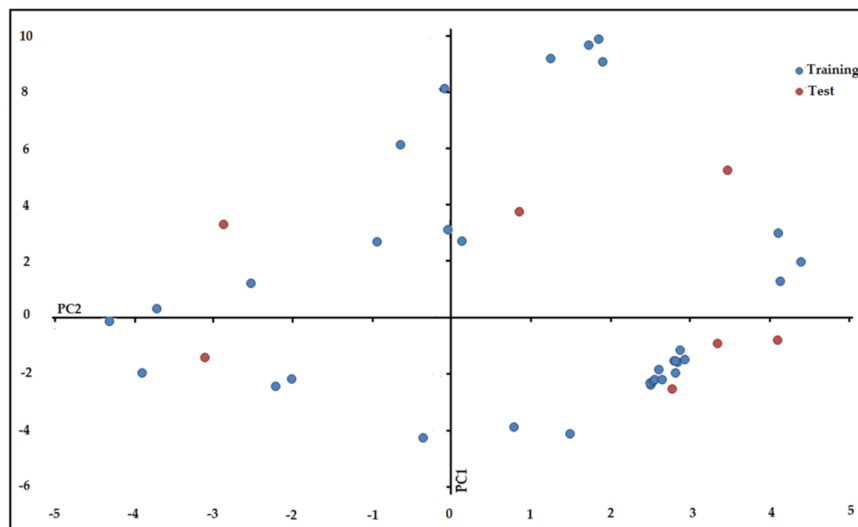

**Figure S9.** A PCA plot between the first two principal components (PC1 & PC2) defining the descriptor space of the training set and test set.

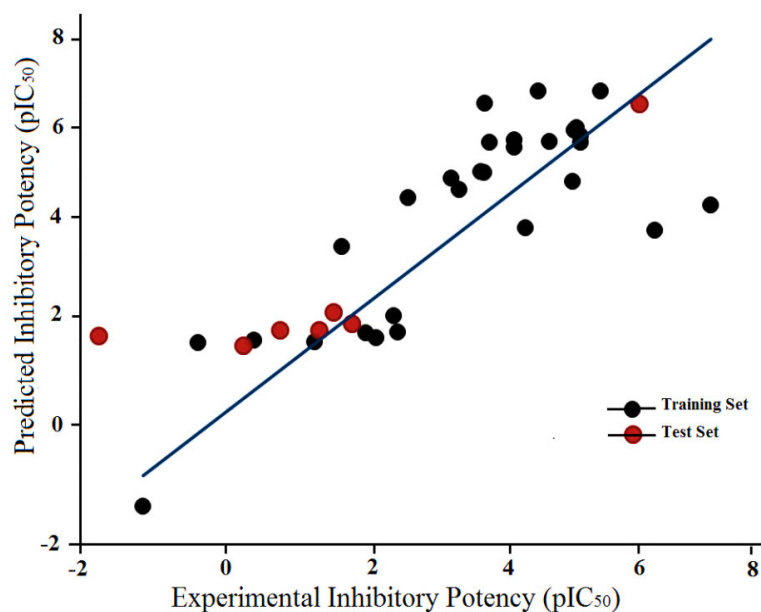

**Figure S10.** Representing a correlation plot between experimental versus predicted inhibitory potencies (pIC<sub>50</sub>) of IP<sub>3</sub>R antagonists. The training set is represented by black circles while the test set is represented by red circles.

**Table S2.** The statistical parameters of PLS models generated by GRIND measured by cross-validation method.

| Cross-Validation Method | Fractional Factorial Design (FFD) Cycle |                |      |                  |                |      |                  |                |            |
|-------------------------|-----------------------------------------|----------------|------|------------------|----------------|------|------------------|----------------|------------|
|                         | Complete                                |                |      | FFD <sub>1</sub> |                |      | FFD <sub>2</sub> |                |            |
|                         | Q <sup>2</sup>                          | R <sup>2</sup> | SDEP | Q <sup>2</sup>   | R <sup>2</sup> | SDEP | Q <sup>2</sup>   | R <sup>2</sup> | SDEP       |
| LOO                     | 0.61                                    | 0.64           | 1.1  | 0.68             | 0.71           | 1.0  | <b>0.70</b>      | <b>0.72</b>    | <b>0.9</b> |
| LFO (1-5)               | 0.60                                    | 0.62           | 1.2  | 0.62             | 0.63           | 1.1  | <b>0.64</b>      | <b>0.66</b>    | <b>1.0</b> |
| LFO (5-10)              | 0.62                                    | 0.64           | 1.1  | 0.64             | 0.65           | 1.0  | <b>0.62</b>      | <b>0.65</b>    | <b>1.1</b> |
| LFO (10-15)             | 0.59                                    | 0.61           | 1.3  | 0.59             | 0.60           | 1.2  | <b>0.59</b>      | <b>0.61</b>    | <b>1.3</b> |
| LFO (16-20)             | 0.58                                    | 0.60           | 1.2  | 0.59             | 0.61           | 1.1  | <b>0.60</b>      | <b>0.61</b>    | <b>1.1</b> |
| LFO (21-25)             | 0.59                                    | 0.62           | 1.4  | 0.58             | 0.61           | 1.3  | <b>0.60</b>      | <b>0.62</b>    | <b>1.2</b> |
| LFO (26-30)             | 0.61                                    | 0.63           | 1.2  | 0.61             | 0.60           | 1.3  | <b>0.60</b>      | <b>0.61</b>    | <b>1.3</b> |

LOO = Leave-One-Out, LFO = Leave-Five-Out

**Table S3.** The experimental inhibitory potency compared with inhibitory potency predicted by GRIND. The residual values of  $\pm 2$  log units are considered optimal.

| Comp            | Experimental pIC <sub>50</sub> | Predicted pIC <sub>50</sub> | Residual Value | rm <sup>2</sup> | S <sub>new</sub> | AD (Outlier) | Comp            | Experimental pIC <sub>50</sub> | Predicted pIC <sub>50</sub> | Residual Value | rm <sup>2</sup> | S <sub>new</sub> | AD (Outlier) |
|-----------------|--------------------------------|-----------------------------|----------------|-----------------|------------------|--------------|-----------------|--------------------------------|-----------------------------|----------------|-----------------|------------------|--------------|
| Training Set    |                                |                             |                |                 |                  |              | Training Set    |                                |                             |                |                 |                  |              |
| A <sub>4</sub>  | 2.53                           | 1.24                        | 1.28           | -0.33           | 1.29             | -            | M <sub>6</sub>  | 4.3                            | 4.36                        | -0.06          | 3.24            | 2.59             | -            |
| A <sub>8</sub>  | 0.36                           | 1.12                        | -0.76          | 0.46            | 0.96             | -            | M <sub>7</sub>  | 4.3                            | 4.24                        | 0.05           | 3.33            | 0.8              | -            |
| A <sub>3</sub>  | 1.28                           | 1.09                        | 0.18           | 0.73            | 2.61             | -            | A <sub>1</sub>  | 1.57                           | 1.56                        | 0.01           | 1.43            | 1.12             | -            |
| A <sub>12</sub> | -0.47                          | 1.08                        | -1.55          | 0.11            | 0.93             | -            | M <sub>9</sub>  | 3.92                           | 4.32                        | -0.4           | 1.44            | 1.52             | -            |
| A <sub>7</sub>  | 2.21                           | 1.16                        | 1.05           | -0.05           | 0.96             | -            | C <sub>2</sub>  | 6.7                            | 4.9                         | 1.8            | -2.28           | 1.18             | -            |
| A <sub>11</sub> | -1.3                           | -1.56                       | 0.26           | -0.63           | 0.59             | -            | A <sub>5</sub>  | 0.76                           | 1.28                        | -0.52          | 0.21            | 1.69             | -            |
| B <sub>5</sub>  | 5.59                           | 5.15                        | 0.43           | 1.92            | 1.21             | -            | A <sub>6</sub>  | 0.2                            | 1.03                        | -0.82          | 0.01            | 1.31             | -            |
| B <sub>4</sub>  | 5.19                           | 4.51                        | 0.67           | 0.94            | 1.1              | -            | C <sub>1</sub>  | 6.3                            | 4.46                        | 1.84           | -2.24           | 1.61             | -            |
| B <sub>1</sub>  | 5.18                           | 3.69                        | 1.48           | -1.12           | 1.13             | -            | M <sub>13</sub> | 4.65                           | 5.15                        | -0.49          | 1.39            | 1.53             | -            |
| B <sub>2</sub>  | 5.3                            | 4.43                        | 0.86           | 0.38            | 1.15             | -            | M <sub>14</sub> | 3.85                           | 4.95                        | -1.1           | -0.18           | 1.47             | -            |
| B <sub>3</sub>  | 5.23                           | 4.56                        | 0.66           | 0.98            | 1.34             | -            | M <sub>15</sub> | 3.83                           | 3.84                        | -0.01          | 3.44            | 0.79             | -            |
| C <sub>3</sub>  | 6.42                           | 2.9                         | 3.51           | -5.6            | 1.58             | -            | M <sub>16</sub> | 3.79                           | 3.85                        | -0.06          | 2.86            | 0.89             | -            |
| M <sub>1</sub>  | 4.46                           | 2.93                        | 1.53           | -1.05           | 1.04             | -            | A <sub>2</sub>  | 1.85                           | 1.38                        | 0.46           | 0.59            | 1.19             | -            |
| M <sub>4</sub>  | 5.3                            | 4.32                        | 0.97           | 0.08            | 2.49             | -            | A <sub>9</sub>  | 1.35                           | 1.28                        | 0.07           | 0.99            | 1.07             | -            |
| M <sub>5</sub>  | 4.82                           | 4.33                        | 0.48           | 1.48            | 1.82             | -            | M <sub>19</sub> | 7.25                           | 5.53                        | 1.72           | -2.25           | 1.69             | -            |

**Table S4.** The experimental inhibitory potency of test set compared with inhibitory potency predicted by GRIND. The modified  $r^2$  ( $rm^2$ ) calculated and the values greater than 0.5 are considered optimal.

| Comp            | Experi-<br>mental<br>pIC <sub>50</sub> | Predicted<br>pIC <sub>50</sub> | Residual<br>Value | $rm^2$ | $S_{new}$ | AD_Info<br>(Outlier) |
|-----------------|----------------------------------------|--------------------------------|-------------------|--------|-----------|----------------------|
| Test Set        |                                        |                                |                   |        |           |                      |
| M <sub>8</sub>  | 3.46                                   | 3.55                           | -0.09             | 2.434  | 1.29      | -                    |
| M <sub>11</sub> | 2.06                                   | 1.24                           | 0.81              | 0.195  | 1.13      | -                    |
| M <sub>12</sub> | 1.69                                   | 2.63                           | -0.93             | 0.576  | 1.16      | -                    |
| M <sub>10</sub> | 2.48                                   | 1.51                           | 0.96              | 0.464  | 1.72      | -                    |
| M <sub>17</sub> | 3.34                                   | 3.74                           | -0.4              | 1.222  | 1.42      | -                    |
| M <sub>18</sub> | 2.69                                   | 3.42                           | -0.72             | 0.393  | 0.92      | -                    |
| A <sub>10</sub> | 1.96                                   | 1.18                           | 0.78              | 0.596  | 0.54      | -                    |
| B <sub>6</sub>  | 6.18                                   | 4.94                           | 1.23              | 0.966  | 2.29      | -                    |

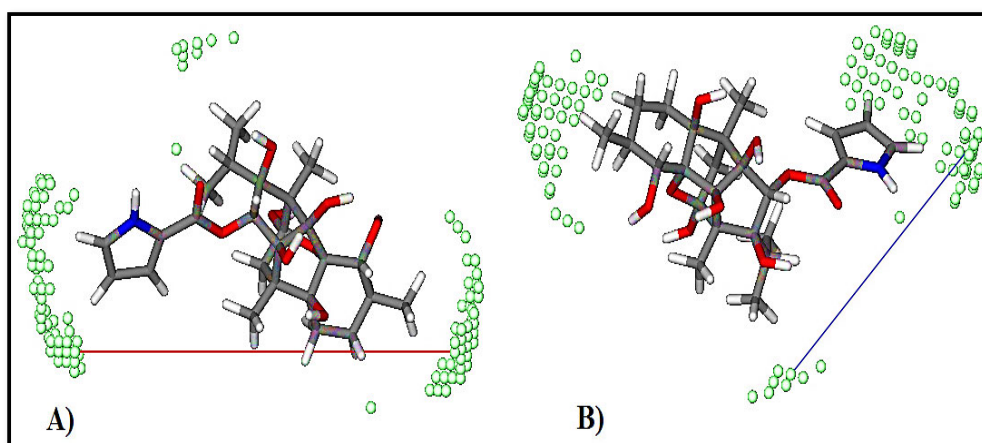

**Figure S11.** (A). TIP contour around the template molecule showing the curved molecular boundary at a wider distance of 16.40 Å - 16.80 Å is positively correlated with the inhibitory potency of IP<sub>3</sub>R. (B). whereas, the linear formed TIP at a shorter distance of 10.00 Å - 10.40 Å is negatively correlated with the inhibitory potency of IP<sub>3</sub>R.

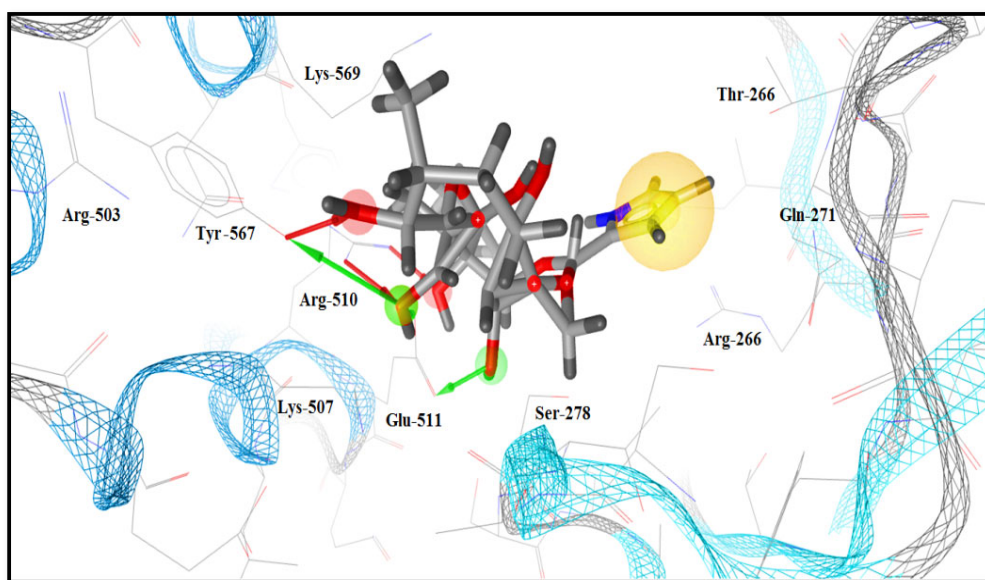

**Figure S12.** The binding pose of template molecule representing important pharmacophoric features in complementing with amino acid residues within IP<sub>3</sub>R binding core.

## 2. Materials and Methods

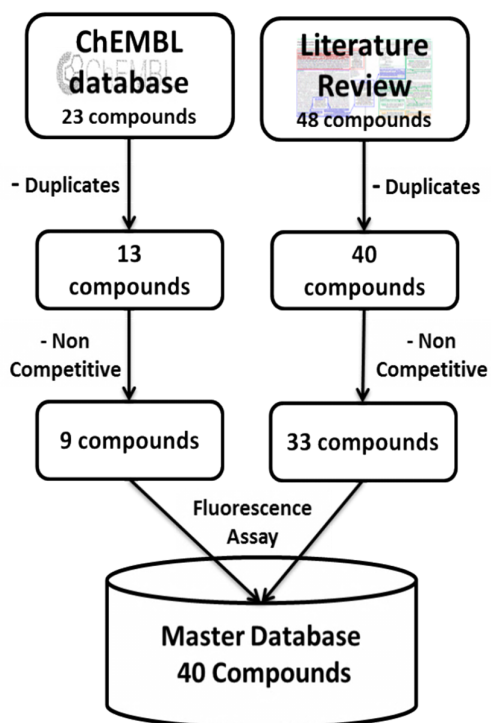

Figure S13. Step-by-step data curation process to obtain a master database of IP<sub>3</sub>R.

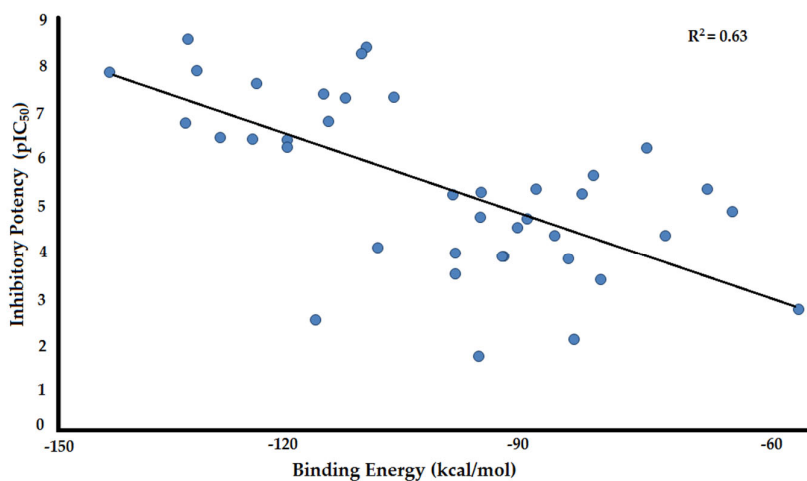

Figure S14. A correlation plot between binding energies of top docked poses vs. potential inhibitory potency (pIC<sub>50</sub>) showing good correlation i.e. 0.63.

## 2. Conformational Analysis of Ligand dataset for GRIND:

### 1. Energy minimized conformations

Briefly, a stochastic search algorithm in MOE 2019.01 [21] was applied to generate energy minimized conformations of the ligand dataset. The generated conformations were ranked according to their energy values and a total of 300 conformations were produced. Each ligand with the lowest energy score was considered for the GRIND analysis.

### 2. Standard 3D conformations

To obtain standard 3D conformations of the ligand dataset, an online version of CORINA software [22] was used. The 3D model of a molecule is built-in CORINA by connecting the mono-centric fragments with standard bond lengths and bond angles. The dihedral angles along with torsion angles of ring systems and the Van der Waals and electrostatic (non-bonded) interactions are also considered and minimized. The final 3D conformation of each ligand was further subjected to Pentacle v 1.0.7 [23] as input for GRIND analysis.

### 3. References

- Adelt, S., et al., *Enzyme-assisted total synthesis of the optical antipodes d-myo-inositol 3, 4, 5-trisphosphate and d-myo-inositol 1, 5, 6-trisphosphate: aspects of their structure–activity relationship to biologically active inositol phosphates*. Journal of medicinal chemistry, 1999. **42**(7): p. 1262-1273.
- Liu, C., et al., *Synthesis, Calcium Mobilizing, and Physicochemical Properties of d-c hiro-Inositol 1, 3, 4, 6-Tetrakisphosphate, a Novel and Potent Ligand at the d-m yo-Inositol 1, 4, 5-Trisphosphate Receptor*. Journal of medicinal chemistry, 1999. **42**(11): p. 1991-1998.
- Hill, T.D., P.-O. Berggren, and A.L. Boynton, *Heparin inhibits inositol trisphosphate-induced calcium release from permeabilized rat liver cells*. Biochemical and biophysical research communications, 1987. **149**(3): p. 897-901.
- Bai, Y., M. Edelmann, and M.J. Sanderson, *The contribution of inositol 1, 4, 5-trisphosphate and ryanodine receptors to agonist-induced Ca<sup>2+</sup> signaling of airway smooth muscle cells*. American Journal of Physiology-Lung Cellular and Molecular Physiology, 2009. **297**(2): p. L347-L361.
- Mills, S.J., et al., *Multivalent benzene polyphosphate derivatives are non-Ca<sup>2+</sup>-mobilizing Ins (1, 4, 5) P<sub>3</sub> receptor antagonists*. Messenger, 2012. **1**(2): p. 167-181.
- Gafni, J., et al., *Xestospongins: potent membrane permeable blockers of the inositol 1, 4, 5-trisphosphate receptor*. Neuron, 1997. **19**(3): p. 723-733.
- Ta, T.A., et al., *Hydroxylated xestospongins block IP<sub>3</sub>-induced Ca<sup>2+</sup> release and sensitize Ca<sup>2+</sup>-induced Ca<sup>2+</sup> release mediated by ryanodine receptors*. Molecular Pharmacology, 2005.
- Palade, P., et al., *Pharmacologic differentiation between inositol-1, 4, 5-trisphosphate-induced Ca<sup>2+</sup> release and Ca<sup>2+</sup>-or caffeine-induced Ca<sup>2+</sup> release from intracellular membrane systems*. Molecular Pharmacology, 1989. **36**(4): p. 673-680.
- Föhr, K., et al., *Decavanadate displaces inositol 1, 4, 5-trisphosphate (IP<sub>3</sub>) from its receptor and inhibits IP<sub>3</sub> induced Ca<sup>2+</sup> release in permeabilized pancreatic acinar cells*. Cell calcium, 1991. **12**(10): p. 735-742.
- Jaimovich Pérez, E., et al., *Xestospongin B, a competitive inhibitor of IP<sub>3</sub>-mediated Ca<sup>2+</sup> signalling in cultured rat myotubes, isolated myonuclei, and neuroblastoma (NG108-15) cells*. 2005.
- Adunyah, S.E. and W. Dean, *Effects of sulphydryl reagents and other inhibitors on Ca<sup>2+</sup> transport and inositol trisphosphate-induced Ca<sup>2+</sup> release from human platelet membranes*. Journal of Biological Chemistry, 1986. **261**(28): p. 13071-13075.
- Podeschwa, M., et al., *Stereoselective Synthesis of myo-, neo-, L-chiro, D-chiro, allo-, scyllo-, and epi-Inositol Systems via Conduritols Prepared from p-Benzoquinone*. European Journal of Organic Chemistry, 2003. **2003**(10): p. 1958-1972.
- Sczekan, S.R. and F. Strumwasser, *Antipsychotic drugs block IP<sub>3</sub>-dependent Ca<sup>2+</sup>-release from rat brain microsomes*. Biological psychiatry, 1996. **40**(6): p. 497-502.
- Poitras, M., et al., *Interaction of benzene 1, 2, 4-trisphosphate with inositol 1, 4, 5-trisphosphate receptor and metabolizing enzymes*. European Journal of Pharmacology: Molecular Pharmacology, 1993. **244**(3): p. 203-210.
- Akl, H., et al., *HA14-1, but not the BH3 mimetic ABT-737, causes Ca<sup>2+</sup> dysregulation in platelets and human cell lines*. Haematologica, 2013: p. haematol. 2012.080598.
- Richardson, A. and C.W. Taylor, *Effects of Ca<sup>2+</sup> chelators on purified inositol 1, 4, 5-trisphosphate (InsP<sub>3</sub>) receptors and InsP<sub>3</sub>-stimulated Ca<sup>2+</sup> mobilization*. Journal of Biological Chemistry, 1993. **268**(16): p. 11528-11533.
- Seiler, S.M., A.J. Arnold, and H.C. Stanton, *Inhibitors of inositol trisphosphate-induced Ca<sup>2+</sup> release from isolated platelet membrane vesicles*. Biochemical pharmacology, 1987. **36**(20): p. 3331-3337.
- Nagarkatti, N., L.S. Deshpande, and R.J. DeLorenzo, *Levetiracetam inhibits both ryanodine and IP<sub>3</sub> receptor activated calcium induced calcium release in hippocampal neurons in culture*. Neuroscience letters, 2008. **436**(3): p. 289-293.
- Gurney, A.M. and M. Allam, *Inhibition of calcium release from the sarcoplasmic reticulum of rabbit aorta by hydralazine*. British journal of pharmacology, 1995. **114**(1): p. 238-244.
- Wold, S., et al., *Multi-way principal components-and PLS-analysis*. Journal of chemometrics, 1987. **1**(1): p. 41-56.
- Molecular Operating Environment (MOE),, Chemical Computing Group Inc.,2019.01., 1010 Sherbooke St. West, Suite #910, Montreal, QC, Canada, H3A 2R7, 2015.49.
- Classic, C., *Performance improvements, new functionalities and applications of the 3D structure generator CORINA Classic*.
- Pentacle, Version 1.0.7; Molecular Discovery Ltd.: Perugia, Italy; 2009.
